# Supplementary material
Source: publisher figshare collection journal article supplement (https://tandf.figshare.com/articles/dataset/_/7252535)
Supplement: Supplementary file 1 [file 1]

Supplemental material

**Supplemental Table S1** Cox Regression models in predicting MACCEs according to combined categories of TyG and HGI (Tertile 1-2 vs. Tertile 3)

| Hazard Ratio(95%CI)  |                            |                          |                          |                         |
|----------------------|----------------------------|--------------------------|--------------------------|-------------------------|
| Category             | TyG index T1-2<br>HGI T1-2 | TyG index T1-2<br>HGI T3 | TyG index T3<br>HGI T1-2 | TyG index T3<br>HGI T3  |
| (n, Events/subjects) | 61/388                     | 31/145                   | 35/145                   | 33/122                  |
| Unadjusted Model     | Ref                        | 1.418<br>(0.920-2.184)   | 1.637*<br>(1.080-2.480)  | 1.820*<br>(1.192-2.780) |
| Adjusted Model       | Ref                        | 1.467<br>(0.942-2.284)   | 1.714*<br>(1.085-2.705)  | 2.101*<br>(1.303-3.386) |

Models were adjusted for age, sex, body mass index, hypertension, family history of CAD, smoke, HDL-C, non-HDL-C, creatinine, uric acid, hsCRP, Gensini score.

\*p<0.05

**Supplemental Figure S1.** The event-free survival analysis according to combined category levels of TyG index and HGI (Tertile 1-2 VS Tertile 3)

For Peer Review Only

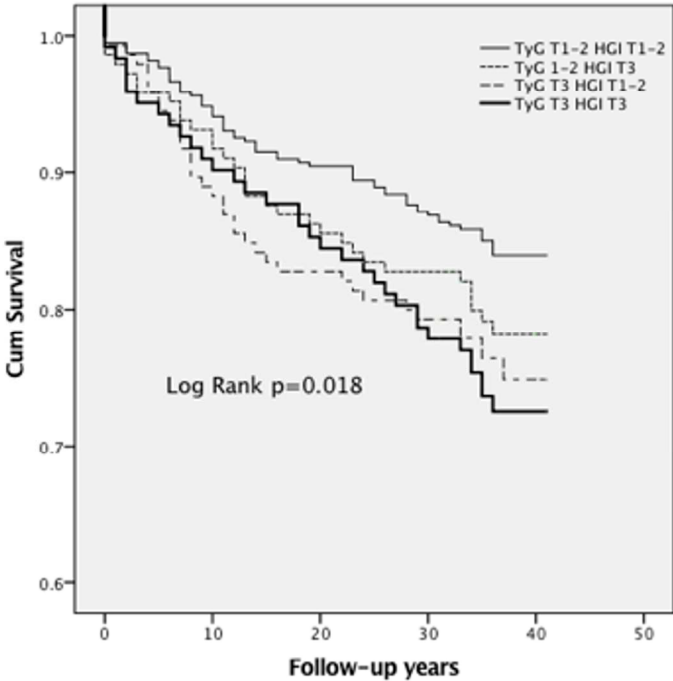

Supplemental Figure S1. The event-free survival analysis according to combined category levels of TyG index and HGI (Tertile 1-2 vs. Tertile 3)

297x420mm (300 x 300 DPI)
